1           **Antivenom accessibility impacts mortality and severity of Brazilian snake**  
2           **envenomation: a geospatial information systems analysis**

3  
4  
5 Authors:

6 Jinny Jing Ye<sup>1</sup>, João Felipe Hermann Costa Scheidt<sup>2</sup>, Luciano de Andrade<sup>2</sup>, Thiago  
7 Augusto Hernandez Rocha<sup>3</sup>, Hui Wen Fan<sup>4</sup>, Wuelton Monteiro<sup>5,6</sup>, Ricardo Palacios<sup>7</sup>,  
8 Catherine Ann Staton<sup>1,8</sup>, João Ricardo Nickenig Vissoci<sup>1,8</sup>, Charles John Gerardo<sup>1</sup>

9  
10 Affiliations:

11 <sup>1</sup> Duke University Medical Center, Department of Surgery, Division of Emergency  
12 Medicine, Durham, North Carolina, United States of America;

13 <sup>2</sup> State University of Maringá, Department of Medicine, Maringá, Parana, Brazil;

14 <sup>3</sup> Federal University of Minas Gerais, Belo Horizonte, Minas Gerais, Brazil;

15 <sup>4</sup> Butantan Institute, São Paulo, São Paulo, Brazil;

16 <sup>5</sup> State University of Amazonas, Manaus, Amazonas, Brazil;

17 <sup>6</sup> Tropical Medicine Foundation Dr. Heitor Vieira Dourado, Manaus, Amazonas, Brazil;

18 <sup>7</sup> Clinical Trials and Pharmacovigilance Center, Instituto Butantan, São Paulo, Brazil;

19 <sup>8</sup> Duke Global Health Institute, Durham, North Carolina, United States of America;

20  
21 Author Disclosure Information:

22 Dr. Catherine Ann Staton would like to disclose salary support from the National  
23 Institutes of Health Fogarty International Center K01- TW010000-01A1 (PI Staton);

24 Dr. Charles John Gerardo: Salary support BTG International Inc;

25 Jinny Jing Ye: Project funding from Duke Brazil Initiative Grant;

26  
27 Abstract: 333 words

28 Plain text: 1,515 words

29 Tables: 3

30 Figures: 6

31 References: 21

32  
33 Corresponding author:

34 Professor João Ricardo Nickenig Vissoci

35 Duke Emergency Medicine, Duke University Medical Center

36 Durham, North Carolina, 27703, United States of America

37 jnv4@duke.edu

38  
39  
40

## 41 **Abstract**

42

### 43 **Background**

44 In 2017, the World Health Organization declared the snakebite envenomation as a  
45 neglected tropical disease. Annually, snakebite envenomation causes approximately  
46 400,000 permanent disabilities and 95,000 deaths worldwide. People with the greatest  
47 risk of envenomation lack access to adequate health care, including treatment with  
48 antivenom. We developed an analysis of accessibility to antivenom in Brazil in order to  
49 verify the impacts on mortality.

50

### 51 **Methods and Findings**

52 Information about number of accidents, deaths, antivenom, medical assistance, and  
53 species, were retrieved from the Brazilian Health Informatics Department (DATASUS)  
54 from 2010 to 2015 and analyzed using geostatistics to evaluate the association between  
55 snakebite accidents and mortality. An Spatial analysis using Global Moran's I was  
56 performed in order to verify the presence of spatiality as an independent variable to the  
57 distribution of the accidents. In addition, we also tested three different analysis of  
58 regression using Ordinary Least Square (OLS), Spatial Error, and Geographically  
59 Weighed Regression (GWR), together with the information obtained from the DATASUS  
60 and sociodemographic indicators, to verify the spatial-temporal distribution of  
61 envenomation cases and time to reach the healthcare centers. The regression  
62 presenting the lowest Akaike Criterion Information (AIC), highest adjusted  $R^2$ , and  
63 variables with  $p < 0.05$  was selected to represent our model. Lastly, the accessibility  
64 index was performed using 2-step floating catchment area based on the amount of  
65 hospital beds and inhabitants. This study revealed 141,039 cases of snakebites, 598  
66 deaths, and mortality rate of 3.13 per 1,000,000 inhabitants. Moreover, GWR presented  
67 the best fit (AIC = 55477.56; adjusted  $R^2 = 0.55$ ) and showed that illiteracy, income,  
68 percentage of urban population, percentage of antivenom, accessibility index for  
69 hospital beds with antivenom, proportion of cases with more than 3 hours to reach  
70 healthcare are correlated with the mortality rate by snakebite ( $p < 0.05$ ).

71

### 72 **Conclusion**

73 This study identified regions affected by snakebite and how the accessibility to  
74 antivenom treatment plays an important role in the mortality in Brazil. Public  
75 interventions can be located to those most vulnerable regions in order to improve the  
76 accident outcome.

77

78 **Keywords:** snake bites, health services accessibility, spatial analysis, poisoning,  
79 epidemiology

80

## 81 **Introduction**

82

83 Snake envenomation is a neglected tropical disease of global importance (1).  
84 Estimations around the world are between 1.2 and 5.5 million bites, 421,000  
85 envenomations, 20,000-95,000 deaths, and 400,000 permanent disabilities annually (2).  
86 The morbidity and mortality related to this disease primarily impacts resource-limited  
87 countries as well as those with lower income earning and other socioeconomic  
88 indicators of poverty (3).

89 In Brazil between 2001 and 2012, 1,192,667 incidents and 2,664 deaths resulting  
90 from terrestrial venomous animals (snakes, scorpions, bees, spiders, and caterpillars)  
91 were reported. Of these, 28% of all incidences and 54% of deaths were attributed to  
92 snake envenomation (4). Of the reported snakebites, 70% of them were from the  
93 Bothrops genus. Bothrops envenomation can cause many clinically significant effects  
94 from local swelling and bleeding to muscle necrosis, acute kidney injury and cerebral  
95 hemorrhage (5) (6). Thus, it becomes important for victims to reach health assistance in  
96 time.

97 Access to snake-specific antivenom is limited because of expensive  
98 manufacturing and long transport time to healthcare facility (7). Feitosa et al. 2015  
99 found delays in healthcare access in the Amazon is associated with greater severity and  
100 mortality related to snake envenomation (8). Additionally, socioeconomic inequalities  
101 have also been linked with lower access health care (9). There is substantial research  
102 on the uneven distribution of health care facilities in Brazil (10). However, there is no  
103 analysis on accessibility to healthcare and its impacts on snakebite mortality rates in  
104 Brazil. Besides, it has not yet been reported how social inequalities are associated with  
105 snakebite outcomes.

106 Therefore, the aim of this study is to analyze the accessibility to antivenom taking  
107 into the account the sociodemographics indicators in Brazil in order to verify its impacts  
108 on snakebite envenomation mortality using spatial analysis.

109

## 110 **Methods**

### 111 **Study Design**

112 This study used cross-sectional data on country-wide snakebite envenomations  
113 from 2010 to 2015 from National System Identification of Notifiable Diseases (SINAN)  
114 stored at DATASUS. We conducted an exploratory spatial analysis to evaluate the  
115 geospatial association of snake envenomation mortality in Brazil with socioeconomic  
116 predictors (illiteracy, income, percentage of urban area, and human development  
117 index), and healthcare access predictors (number of beds, hospitals and health  
118 professionals, quantity of antivenom administrated, antivenom coverage, and time to  
119 reach the healthcare centers).

120

## 121 Study population and location

122 Brazil has a population of 190,732,694 people distributed to 5 regions (North,  
 123 Northeast, Midwest, Southeast and South) (Figure 1)(11). In recent years, the Brazilian  
 124 economy has grown rapidly, and the country's gross domestic product (GDP) is  
 125 currently the ninth largest globally (9). Brazil has also faced an economic and political  
 126 crisis since 2010. Despite the growth in the recent years, not all segments of the  
 127 Brazilian population have benefited uniformly from this rapid development, resulting in  
 128 substantial income inequality within and between regions of the country, as depicted in  
 129 Figure 1 (9).

130

131

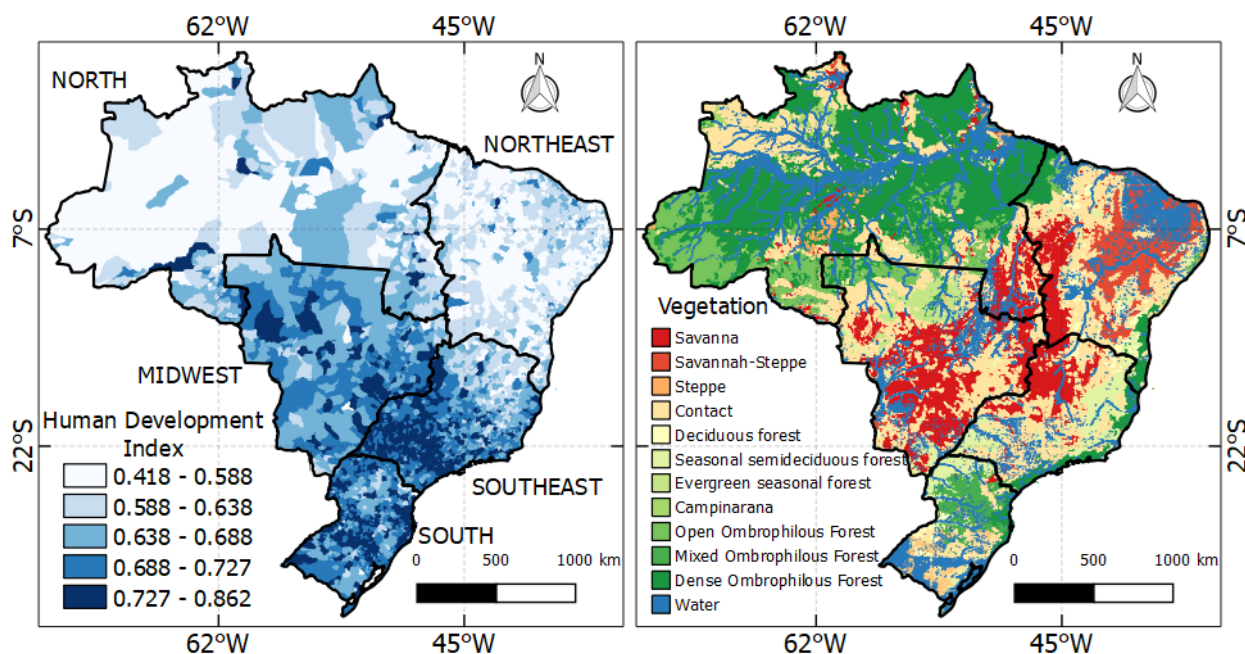

132

133 Figure 1. Brazilian gross domestic product on the left and the vegetation on the right.

134

## 135 Data sources and variables

136

### 137 Data extraction

138 Data regardless sociodemographic indicators were extracted from the Brazilian  
 139 Institute of Geography and Statistic 2010 Census (11), while information about  
 140 healthcare centers were obtained from DATASUS and the National Register of Health  
 141 Facilities (CNES).

142

### 143 Snakebite envenomation data

144 The number of envenomations, hospitalizations from envenomations, deaths  
 145 from envenomations, time to reach healthcare centers and number of envenomations  
 146 that were treated with antivenom were collected from SINAN (12). Snakebite outcomes

147 included: mortality, systemic and local complications. An aggregate indicator for  
148 snakebite negative outcomes was generated by a sum of the municipality level mortality  
149 and complications. Snakebite specific healthcare indicators were: proportion of cases  
150 notified more than 3 hours to reach healthcare assistance, and proportions of cases  
151 with notified antivenom usage.

152

### 153 Data analysis

154 All analyses in this study were conducted at the municipality-level. Snakebite  
155 frequency and complications, socioeconomic indicators and healthcare access were  
156 summarized using descriptive statistics.

157

### 158 Availability of care in hospitals with antivenom

159 We calculated the availability of hospitals with antivenom by mapping the  
160 facilities that received antivenom obtained from the Butantã Institute, agency  
161 responsible for producing and distributing antivenom across the country. To evaluate  
162 the accessibility to hospitals with antivenom, we used the two-step floating catchment  
163 area (2SFCA) method (13). The 2SFCA creates an index of hospitals with antivenom  
164 weighted by population in two concurrent steps. In the first step, a buffer was created  
165 with a Euclidean 120 kilometer (km) radius surrounding each hospital with antivenom.  
166 This buffer was created to collect the population potentially covered in all locations (k)  
167 within the threshold. The 120 km range limit was used to estimate a travel distance of  
168 two hours to the nearest hospital by car or public transport. The second step consists of  
169 summing up the initial ratios in overlapped service areas to measure accessibility for a  
170 demand location, where residents have access to multiple supply locations. These  
171 steps produced an accessibility index of hospital bed availability with antivenom for  
172 each municipality. A higher accessibility index indicates more hospital bed available with  
173 antivenom for a given municipality.

174

### 175 Spatial regression

176 The Ordinary Least Square (OLS), Spatial Error and geographically weighted  
177 regression (GWR) were used to verify the regression with the best fit capable to  
178 elucidate the correlation between sociodemographic and healthcare indicators with the  
179 mortality rates by snakebite. The regression with the highest adjusted  $R^2$ , lowest AIC,  
180 and significant variables ( $p < 0.05$ ) was chosen as the main model for the study. The  
181 spatial autocorrelation and the OLS model were processed using GeoDa software  
182 version 1.10.0.8 (Laboratory of Spatial Analysis, University of Illinois at Urbana-  
183 Champaign, Urbana, USA). The GWR model was calculated and implemented using R  
184 Studio. The maps were generated using QGIS version 2.14.23.

185

186

187

**Table 1.** Data source and selected variables for the analysis.

| Source                                    | Variables                                                                                                                                                                                                                                                                                                                                                                       | Website                                                                                                                     |
|-------------------------------------------|---------------------------------------------------------------------------------------------------------------------------------------------------------------------------------------------------------------------------------------------------------------------------------------------------------------------------------------------------------------------------------|-----------------------------------------------------------------------------------------------------------------------------|
| <b>DATASUS<br/>SINAN</b>                  | Snakebite envenomation data:<br>Frequency of cases by municipality;<br>Frequency of hospital admissions by municipalities;<br>Frequency of deaths by municipality;<br>Frequency of local and systemic complications by municipality;<br>Frequency of cases receiving antivenom by municipality;<br>Frequency of cases reaching the hospital with antivenom with time > 3 hours. | <a href="http://www2.datasus.gov.br/DATASUS/index.php?area=0203">http://www2.datasus.gov.br/DATASUS/index.php?area=0203</a> |
| <b>CNES<br/>and<br/>Butantã Institute</b> | Availability of care in hospitals with antivenom;<br>Geolocation and hospital beds of all hospitals in the country;<br>List of hospitals receiving antivenom.                                                                                                                                                                                                                   | <a href="http://cnes.datasus.gov.br/">http://cnes.datasus.gov.br/</a>                                                       |
| <b>IBGE</b>                               | Socioeconomic indicators:<br>Average income per capita by municipality;<br>Proportion of urban population by municipality;<br>Illiteracy rates by municipality.                                                                                                                                                                                                                 | <a href="https://atlasescolar.ibge.gov.br/">https://atlasescolar.ibge.gov.br/</a>                                           |

DATASUS: Departamento de Informática do Sistema Único de Saúde do Brasil; SINAN: Sistema de Informação de Agravos de Notificação; CNES: Cadastro Nacional de Estabelecimentos de Saúde; IBGE: Instituto Brasileiro de Geografia e Estatística.

188

189

## 190 Results

191

192 Between 2010 and 2015, there were a total of 141,039 reported cases of snake  
193 envenomation. 598 resulted in death and 27,047 had systemic complications from  
194 envenomation. The most frequent cases occurred in the North region (50,102 bites),  
195 followed by Southeast (32,474 bites), and least was the South region (12,130 bites).  
196 The North region was also in the lead regions with deaths, followed by the Northeast,  
197 similar pattern observed to Systemic and Local complications (Table 1).

198 According to the registry, the majority of snakebite envenomation received  
199 antivenom at some point during their care trajectory. However, the North, Northeast and  
200 Midwest had higher proportion of cases with more than 3 hours to reach healthcare  
201 (Table 1). Similarly, these were the same regions with lower number of hospitals with  
202 lower scores for accessibility for antivenom per population.

203

204

205

**Table 2.** Municipalities indicators of sociodemographics and snakebite envenomations information of each region in Brazil from 2010-2015.

| <b>Indicators</b>                                                                    | <b>North</b>       | <b>Northeast</b>    | <b>Midwest</b>     | <b>Southeast</b>    | <b>South</b>        | <b>Amazon</b>     |
|--------------------------------------------------------------------------------------|--------------------|---------------------|--------------------|---------------------|---------------------|-------------------|
| <b>Population</b>                                                                    | 15.86mi<br>(9.31%) | 53.08mi<br>(27.83%) | 14.05mi<br>(7.37%) | 80.35mi<br>(42.12%) | 27.38mi<br>(14.35%) | 3.48mi<br>(1.82%) |
| <b>Percentage of Urban areas</b>                                                     | 56.7%              | 55.2%               | 71.9%              | 75%                 | 60.7%               | 83.4%             |
| <b>Envenomation</b>                                                                  | 50,102<br>(35.52%) | 31,075<br>(22.03%)  | 15,258<br>(10.81%) | 32,474<br>(23.02%)  | 12,130<br>(8.60%)   | 8,480<br>(6.01%)  |
| <b>Deaths</b>                                                                        | 181<br>(30.26%)    | 188<br>(31.43%)     | 61<br>(10.20%)     | 132<br>(22.07%)     | 36<br>(6.02%)       | 47<br>(7.85%)     |
| <b>Systemic complications</b>                                                        | 6,884<br>(28.62%)  | 5,895<br>(24.51%)   | 2,721<br>(11.31%)  | 6,815<br>(28.34%)   | 1,732<br>(7.20%)    | 1,603<br>(6.67%)  |
| <b>Proportions of cases with notified antivenom usage</b>                            | 47,459<br>(33.7%)  | 27,685<br>(19.6%)   | 14,490<br>(10.3%)  | 29,822<br>(21.2%)   | 11,047<br>(7.8%)    | 7,893<br>(6.04%)  |
| <b>Proportion of cases notified more than 3 hours to reach healthcare assistance</b> | 22,809<br>(16.6%)  | 9,485<br>(6.9%)     | 3,180<br>(2.31%)   | 5,143<br>(3.74%)    | 1,681<br>(1.22%)    | 4,413<br>(10.43%) |
| <b>Number of hospitals with antivenom</b>                                            | 231<br>(12.14%)    | 416<br>(21.91%)     | 189<br>(29.62%)    | 564<br>(26.42%)     | 502<br>(9.91%)      | 40<br>(2.10%)     |

206

207

208

209

210

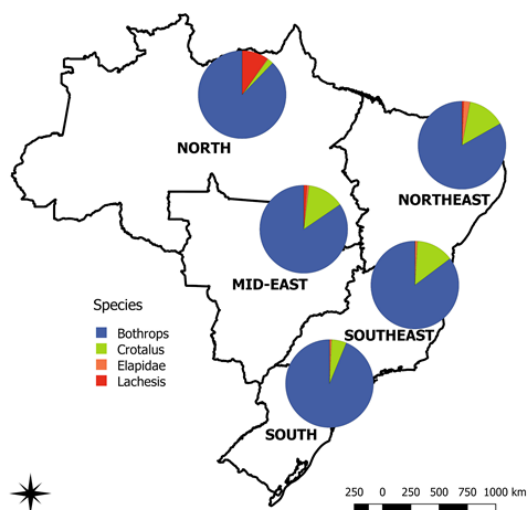

211  
 212 Figure 2. Geographical distribution of snakebite occurrences by snake in Brazil from  
 213 2010 to 2015.  
 214

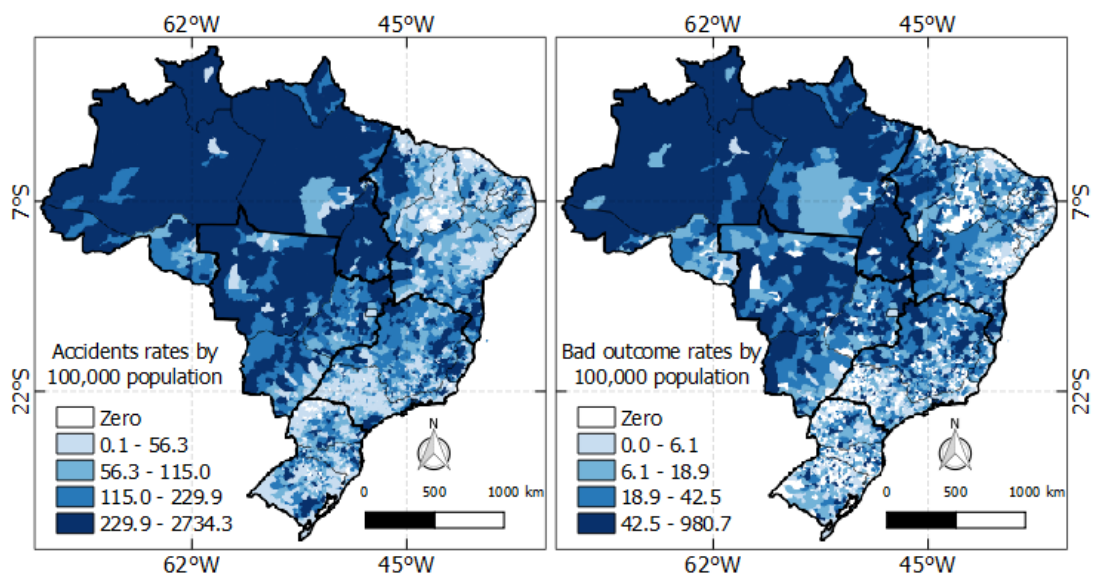

215  
 216 Figure 3. Accidents and deaths per 100,000 inhabitants.  
 217  
 218  
 219



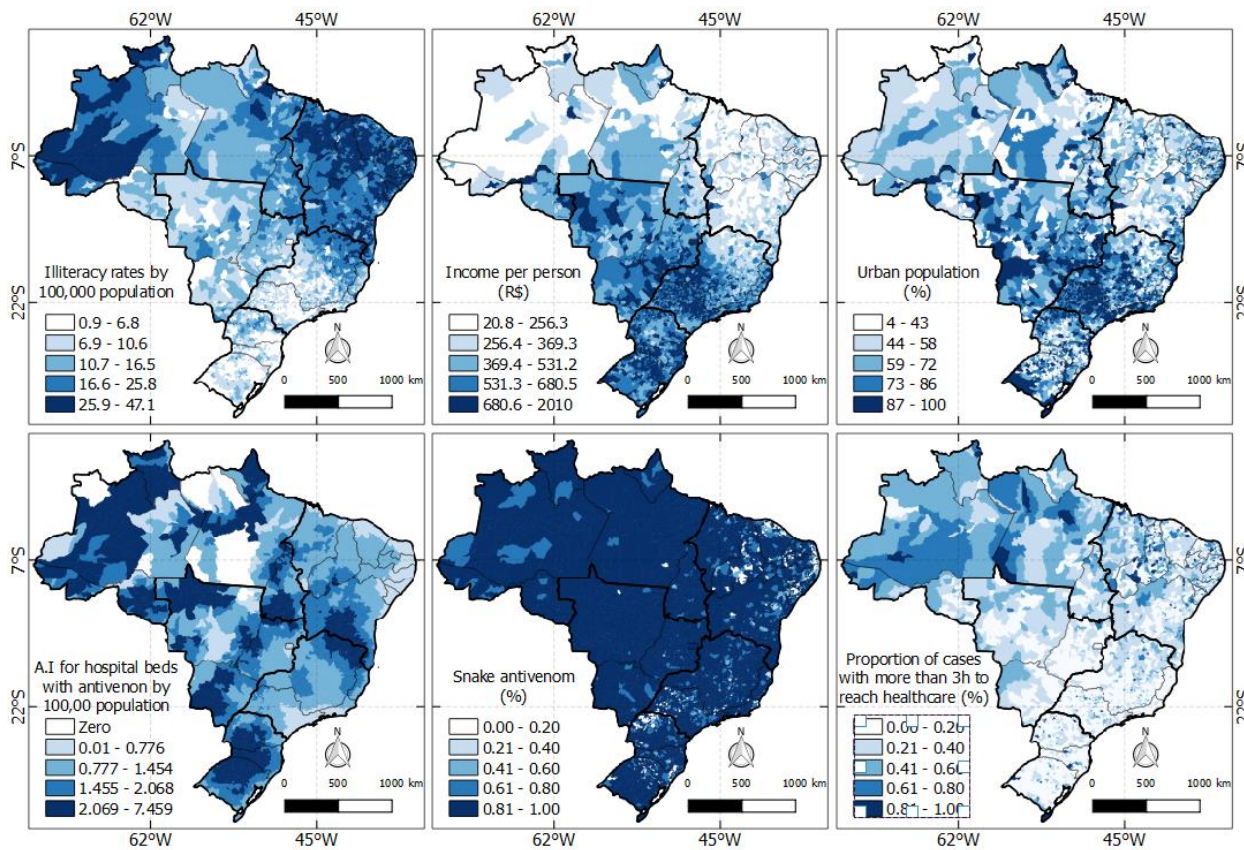

220  
 221 Figure 4. Population-level sociodemographic characteristics and distribution of hospital  
 222 resources throughout Brazil.  
 223

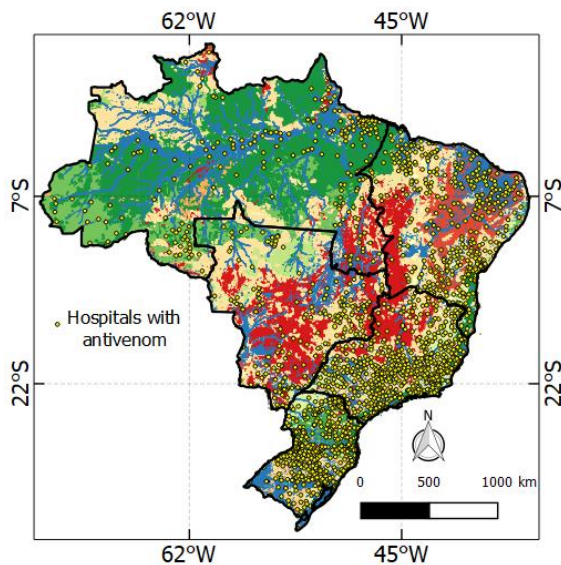

224  
 225 Figure 5. Hospitals with antivenom.  
 226  
 227

228

**Table 3.** Comparison between Ordinary Least Square (OLS), Spatial error and Global geographically weighed regression (GWR).

| Variables                                                                     | OLS        |       |                | Spatial Error |        |                | GWR             |                               |
|-------------------------------------------------------------------------------|------------|-------|----------------|---------------|--------|----------------|-----------------|-------------------------------|
|                                                                               | Estimative | P     | Standard error | Estimative    | $\rho$ | Standard error | Estimation Mean | Estimation standard deviation |
| Illiteracy                                                                    | -0.64      | <0.01 | 0.113          | 0.07          | 0.57   | 0.141          | -0.67           | 1.84                          |
| Income                                                                        | -0.05      | <0.01 | 0.004          | -0.02         | <0.01  | 0.004          | -0.04           | 0.06                          |
| Percentage of Urban area                                                      | -0.24      | <0.01 | 0.035          | -0.37         | <0.01  | 0.034          | -0.23           | 0.32                          |
| Antivenom                                                                     | 26.19      | <0.01 | 2.338          | 13.58         | 2.20   | 0.0            | 26.17           | 24.75                         |
| Accessibility index                                                           | 4.31       | <0.01 | 0.780          | 1.30          | 1.28   | 0.311          | 4.25            | 21.12                         |
| Proportion of cases notified more than 3 hours to reach healthcare assistance | 25.85      | <0.01 | 2.900          | 9.94          | 2.64   | 0.0            | 25.71           | 23.75                         |
| AIC                                                                           | 58546.8    |       |                | 57231.8       |        |                | 55477.56        |                               |
| Adjusted R <sup>2</sup>                                                       | 0.1127     |       |                | 0.3394        |        |                | 0.5581          |                               |

229

230

231

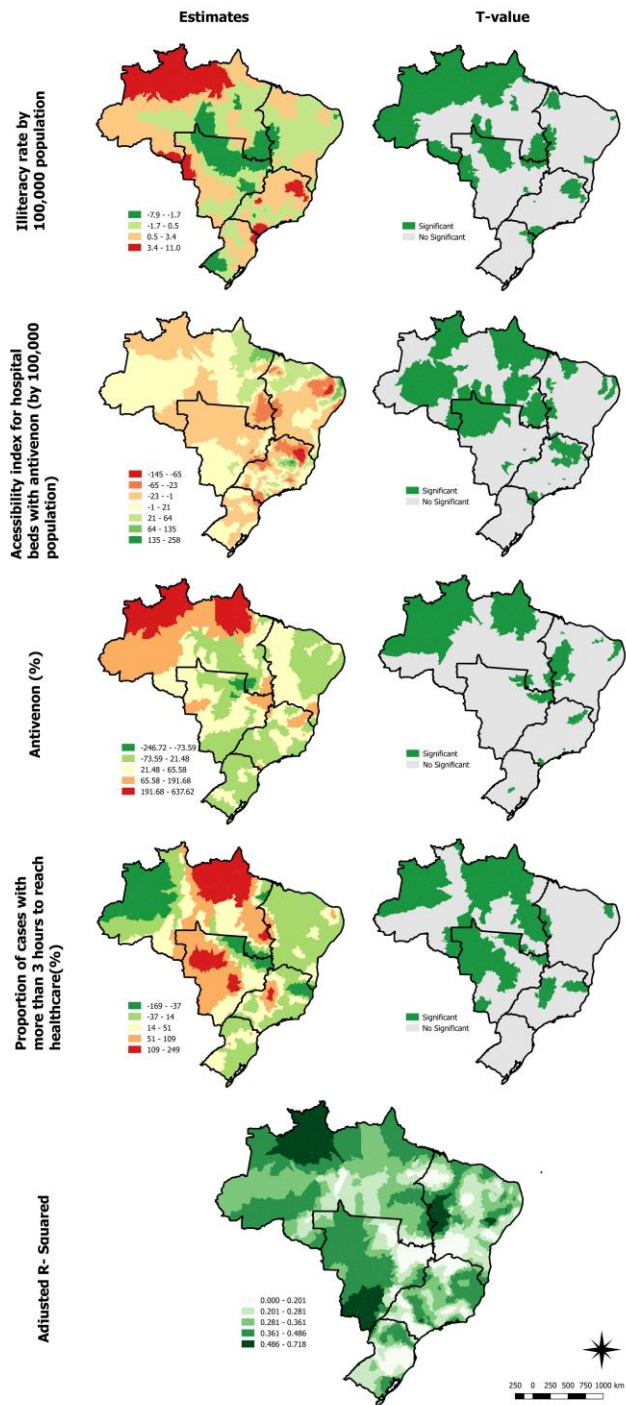

Figure 6. GWR results of significant variables related to the increasing rates of snakebite mortality.

232  
233  
234  
235  
236  
237  
238  
239

## 240 Discussion

241  
242 This study is the first nationwide analysis that evaluates the geospatial impact of  
243 access to healthcare and antivenom on snakebite mortality. We found a heterogeneous  
244 distribution of snakebite mortality and accessibility to healthcare. This is probably  
245 attributed to Brazil's continental dimensions where there are several costumes and  
246 cultures (14, 15).

247 However, the results showed that mortality particularly affected rural and  
248 underdeveloped regions of the country. This geographical disparity is corroborated by  
249 some studies that revealed that snakebite is a poverty disease and its mortality is  
250 correlated with the workforce in agriculture (3, 16). Additionally, the GWR also showed  
251 that low illiteracy, income, and percentage of urban area are related to the increased  
252 snakebite mortality. Similar study conducted by Suraweera et al (2020) in India also  
253 verified that these indicators are correlated with snakebite mortality (17).

254 Access to antivenom in Brazil varied across the nation with metropolitan areas in  
255 the South and Southeast having abundant access compared to the Northwest. Reduced  
256 access to antivenom in the North is associated with higher rates of mortality in our  
257 study. These are well supplied with antivenom as informed by some studies (18, 19),  
258 but the mortality stands out because of the difficulties to reach the healthcare centers,  
259 mostly because the main means of locomotion in the amazon is by fluvial transport (20).  
260 In addition, those patients that managed to reach healthcare assistance beyond 3 hours  
261 were significantly higher in the north suggesting the struggles with the transport.

262 As for the majority of patients in the country, it was capable to look for health  
263 assistance in 3 hours. Our finding is also consistent with findings in Costa Rica where  
264 the majority of care received was within 2 hours, even in mountainous and rural regions  
265 or other areas with high snakebite incidence. (21)

## 266 267 Limitations

268 First, although SINAN is intended to be a nationally comprehensive and accurate  
269 database on important notifiable diseases, SINAN is as susceptible as other large  
270 population-level databases to reliability and consistency of data collection. Additionally,  
271 provider-level reporting of snakebites relies on accurate recognition and diagnosis.  
272 Thus, underreporting may not capture the whole scope of this important neglected  
273 tropical disease. Second, using a 120km radius to define the catchment area of public  
274 hospitals may not be uniform considering rainforest or rural areas cover 60% of Brazil.  
275 Despite these limitations, our findings are to our knowledge one of the first studies  
276 highlighting the geographical variability of mortality snake envenomations in association  
277 with access to antivenom and healthcare.

278  
279

## 280 **Conclusion**

281 In Brazil low illiteracy, income, percentage of urban area, and accessibility to  
282 antivenom and healthcare centers are related to the increasing of snakebite mortality.  
283 It's noteworthy to mention that this paper provides regions that lack in those indicators  
284 and might be useful for the development of better public actions in order to obtain more  
285 favorable outcomes.

286

## 287 **References**

288

- 289 1. Ranawaka UK, Lalloo DG, de Silva HJ. Neurotoxicity in snakebite--the limits of  
290 our knowledge. *PLoS Negl Trop Dis*. 2013;7(10):e2302.
- 291 2. Fox S, Rathuwithana AC, Kasturiratne A, Lalloo DG, de Silva HJ.  
292 Underestimation of snakebite mortality by hospital statistics in the Monaragala District of  
293 Sri Lanka. *Trans R Soc Trop Med Hyg*. 2006;100(7):693-5.
- 294 3. Harrison RA, Hargreaves A, Wagstaff SC, Faragher B, Lalloo DG. Snake  
295 envenoming: a disease of poverty. *PLoS Negl Trop Dis*. 2009;3(12):e569.
- 296 4. Chippaux JP. Epidemiology of envenomations by terrestrial venomous animals in  
297 Brazil based on case reporting: from obvious facts to contingencies. *J Venom Anim  
298 Toxins Incl Trop Dis*. 2015;21:13.
- 299 5. Cruz LS, Vargas R, Lopes AA. Snakebite envenomation and death in the  
300 developing world. *Ethn Dis*. 2009;19(1 Suppl 1):S1-42-6.
- 301 6. de Oliveiraa SS, de Souza Sampaioa V, Sachetta JdAG, Campos E, Fanc HW,  
302 de Lacerdaa MVG, et al. Snakebites in the Brazilian Amazon: Current Knowledge and  
303 Perspectives. 2016.
- 304 7. Chippaux JP. Estimating the global burden of snakebite can help to improve  
305 management. *PLoS Med*. 2008;5(11):e221.
- 306 8. Feitosa EL, Sampaio VS, Salinas JL, Queiroz AM, da Silva IM, Gomes AA, et al.  
307 Older Age and Time to Medical Assistance Are Associated with Severity and Mortality of  
308 Snakebites in the Brazilian Amazon: A Case-Control Study. *PLoS One*.  
309 2015;10(7):e0132237.
- 310 9. Rasella D, Basu S, Hone T, Paes-Sousa R, Ocké-Reis CO, Millett C. Child  
311 morbidity and mortality associated with alternative policy responses to the economic  
312 crisis in Brazil: A nationwide microsimulation study. *PLoS Med*. 2018;15(5):e1002570.
- 313 10. Garcia-Subirats I, Vargas I, Mogollon-Perez AS, De Paepe P, da Silva MR,  
314 Unger JP, et al. Inequities in access to health care in different health systems: a study in  
315 municipalities of central Colombia and north-eastern Brazil. *Int J Equity Health*.  
316 2014;13:10.
- 317 11. IBGE. Instituto Brasileiro de Geografia e Estatística. Séries estatísticas & séries  
318 históricas. Rio de Janeiro. 2018.

- 319 12. Bochner R, Fiszon JT, Machado C. A profile of snake bites in Brazil, 2001 to  
320 2012. 2014.
- 321 13. Wang F, Luo W. Assessing spatial and nonspatial factors for healthcare access:  
322 towards an integrated approach to defining health professional shortage areas. *Health*  
323 *Place*. 2005;11(2):131-46.
- 324 14. United Nations DoEaSA, Population Division. World Population Prospects: The  
325 2017 Revision. In: United Nations DoEaSA, Population Division, editor. 2017.
- 326 15. Bochner R. The international view of envenoming in Brazil: myths and realities.  
327 *Journal of Venomous Animals and Toxins including Tropical Diseases*. 2013;19(1):29.
- 328 16. Babo Martins S, Bolon I, Chappuis F, Ray N, Alcoba G, Ochoa C, et al.  
329 Snakebite and its impact in rural communities: The need for a One Health approach.  
330 *PLoS Negl Trop Dis*. 2019;13(9):e0007608.
- 331 17. Suraweera W, Warrell D, Whitaker R, Menon G, Rodrigues R, Fu SH, et al.  
332 Trends in snakebite deaths in India from 2000 to 2019 in a nationally representative  
333 mortality study. *Elife*. 2020;9.
- 334 18. Gutiérrez JM, Williams D, Fan HW, Warrell DA. Snakebite envenoming from a  
335 global perspective: Towards an integrated approach. *Toxicon*. 2010;56(7):1223-35.
- 336 19. Gutiérrez JM, Fan HW, Silvera CLM, Angulo Y. Stability, distribution and use of  
337 antivenoms for snakebite envenomation in Latin America: Report of a workshop.  
338 *Toxicon*. 2009;53(6):625-30.
- 339 20. Morgado AV, Portugal LdS, Mello AJR. Acessibilidade na Região Amazônica  
340 através do transporte hidroviário. *Journal of Transport Literature*. 2013;7:97-123.
- 341 21. Hansson E, Sasa M, Mattisson K, Robles A, Gutiérrez JM. Using geographical  
342 information systems to identify populations in need of improved accessibility to  
343 antivenom treatment for snakebite envenoming in Costa Rica. *PLoS neglected tropical*  
344 *diseases*. 2013;7(1):e2009.
- 345
- 346
